# Supplementary material
Source: PubMed Central journal article supplement (PMC3390880)
Supplement: 1203952109_pnas.201203952SI.pdf [file 1203952109_pnas.201203952SI.pdf]

# Supporting Information

Wang et al. 10.1073/pnas.1203952109

## SI Materials and Methods

**Histochemical and Immunofluorescence Analysis.** For histological and immunofluorescence studies, bladders were processed as described (1). The following primary antibodies were used: (i) rabbit and goat polyclonal antibodies to *E. coli* (United States Biological), (ii) mouse monoclonal antibody to E-cadherin (BD Bioscience), (iii) goat polyclonal antibodies to BrdU, (iv) rat monoclonal antibody to Lamp1 (clone ID4B; Developmental Hybridoma Bank, National Institute of Child Health and Human Development), (v) rabbit polyclonal to LC3B (Novus), (vi) guinea pig polyclonal to p62 (Progen), and (vii) rabbit polyclonal to Atg16L1 (Abgent). Antigen-antibody complexes were detected with Alexa Fluor 488-, 594-, and 647-conjugated secondary antibodies (Invitrogen). Images were obtained using Zeiss Apotome at 10–20 $\times$  and 40–63 $\times$  (oil) magnifications.

**Immunoblotting Analysis.** Bladders were isolated, processed, and immunoblotted using primary antibodies (2) [(i) rabbit polyclonal to Atg16L1 (Abgent), (ii) goat polyclonal to UP1a (Santa Cruz), and (iii) rabbit monoclonal to GAPDH (Cell Signaling)] and secondary antibodies [(i) goat anti-rabbit IgGHRP and (ii) donkey

anti-goat IgG-HRP (Santa Cruz)]. The protein bands on the developed film were quantified by Image J (<http://rsb.info.nih.gov/ij/>).

**BrdU Labeling.** BrdU labeling was performed as described (1).

**Quantitative Real-Time PCR Analysis.** RNA was isolated from bladders from uninfected and infected (6 hpi) animals ( $n = 3$  mice per genotype) and processed as described (1).

The following primers were used for detection of the targets (forward primers are listed first followed by reverse primers): 18s, 5'-CGGCTACCACATCCAAGGAA-3' and 5'-GCTGGAATTACCGCGGCT-3'; IL-1 $\beta$ , 5'-GCAACTGTTCTGAACTCAACT-3' and 5'-ATCTTTTGGGGTCCGTCAACT-3'; IL-18, 5'-GACTCTTGCGTCAACTTCAAGG-3' and 5'-CAGGCTGTCTTTTG-TCAACGA-3'; IL-6, 5'-CCAGAAACCGCTATGAAGTTCCT-3' and 5'-CACCAGCATCAGTCCCAAGA-3'; IL-1 $\alpha$ , 5'-GCA-CCTTACACCTACCAGAGT-3' and 5'-AAACTTCTGCCTG-ACGAGCTT-3'; KC, 5'-ACCCAAACCGAAGTCATAGCC-3' and 5'-TTCAGGGTCAAGGCAAGCC-3'; and MIP-2, 5'-TG-AGTGTGACGCCCCCA-3' and 5'-TTTTTGACCGCCCTT-AGAG-3'.

1. Mysorekar IU, Isaacson-Schmid M, Walker JN, Mills JC, Hultgren SJ (2009) Bone morphogenetic protein 4 signaling regulates epithelial renewal in the urinary tract in response to uropathogenic infection. *Cell Host Microbe* 5:463–475.

2. Cadwell K, et al. (2008) A key role for autophagy and the autophagy gene Atg16L1 in mouse and human intestinal Paneth cells. *Nature* 456:259–263.

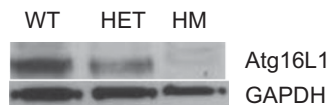

**Fig. S1.** Expression of Atg16L1 protein in Atg16L1<sup>HM</sup> (HM) bladders. HM and Atg16L1<sup>HM</sup> heterozygote mice (only one hypomorphic allele) mice show 78% and 59% knockdown of the Atg16L1 protein, respectively (~68-kDa doublet) compared with WT. Knockdown was measured by immunoblotting and normalized to GAPDH loading control.  $n = 2$  experiments.



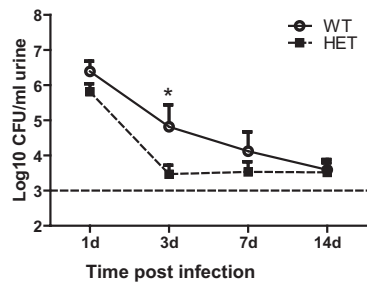

**Fig. S4.** A single hypomorphic *Atg16L1* allele is sufficient to confer protection to UPEC infection. CFU counts of bacteriuria plotted as mean  $\pm$  SEM of the log10 value 1–14 dpi, indicating significant reductions of bacteriuria in *Atg16L1* heterozygote mice at 3 dpi.  $n = 5\text{--}15$  mice per time point per genotype;  $n = 2$  experiments. \* $P < 0.05$  by two-way ANOVA with Bonferroni posttest.

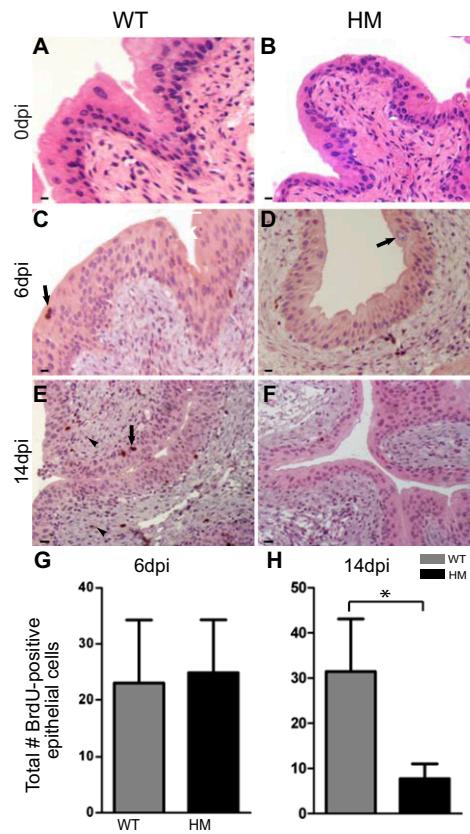

**Fig. S5.** Superficial urothelial cell regeneration postinfection is hastened in *Atg16L1*-deficient bladders. (A and B) H&E- and BrdU-stained WT (A) and HM (B) bladders at 0 dpi, respectively, showing normal morphology of the bladder before infection with no BrdU<sup>+</sup> cells observed. (C–F) H&E- and BrdU-stained WT (C and E) and HM (D and F) bladders at 6 and 14 dpi, showing BrdU<sup>+</sup> cells (brown, arrows in C and E), neutrophils (C and E, arrowhead), and superficial cells (arrow in D). (Scale bar: 10  $\mu\text{m}$ .) BrdU counts at (G) 6 and (H) 14 dpi depicting rapid recovery from infection in HM mice.  $n = 15\text{--}20$  mice per time point per condition. Bars represent mean  $\pm$  SEM. \* $P < 0.05$  by unpaired two-tailed  $t$  test.

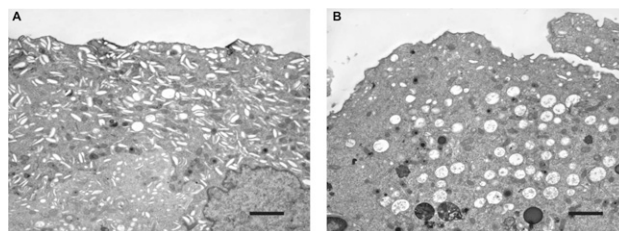

**Fig. S6.** *Atg16L1* deficiency-induced alteration of superficial cell architecture is intrinsic to the deficiency and not altered by infection. Transmission EM analysis showing WT (A) and HM (B) newly regenerated superficial cells at 14 dpi, depicting ultrastructural abnormalities in HM urothelium. (Scale bar: 2  $\mu\text{m}$ .)

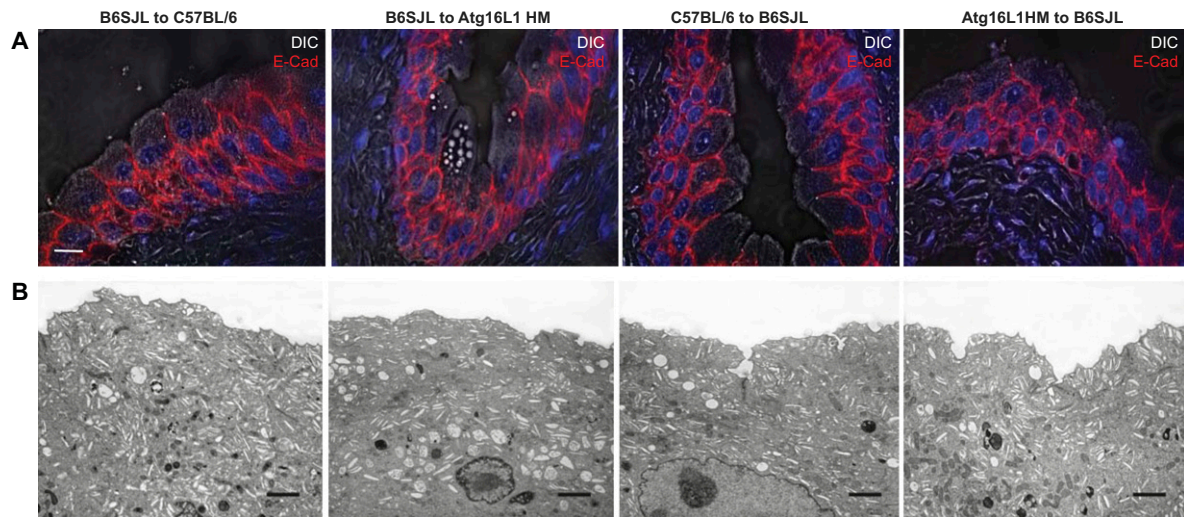

**Fig. S7.** Atg16L1 deficiency in the hematopoietic compartment does not induce epithelial abnormalities. (A) Immunofluorescence (IF) and differential interference contrast (DIC) imaging analysis showing enhanced vesicular congestion in Atg16L1<sup>HM</sup> recipients receiving WT bone marrow but not in WT mice receiving HM bone marrow. E-cadherin (red) outlines urothelial cells; nuclei are blue with biz-benzimide. (Scale bar: 10 μm.) (B) Transmission EM showing superficial cell ultrastructures in different groups of mice, confirming the presence of architectural defects in Atg16L1<sup>HM</sup> recipients receiving WT bone marrow urothelium. (Scale bar: 1 μm.)

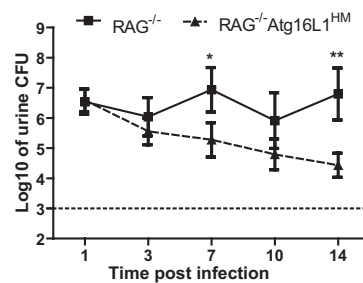

**Fig. S8.** Atg16L1 deficiency in the innate immune compartment induces enhanced bacteriuric clearance in mice lacking an intact adaptive immune system. Rag1<sup>-/-</sup>/Atg16L1<sup>HM</sup> double mutants on a C57BL/6 strain background were generated by first back-crossing Atg16L1<sup>HM</sup> mice onto a C57BL/6 background and then breeding with Rag1<sup>-/-</sup> mice. CFU counts of bacteriuria plotted as mean ± SEM of the log<sub>10</sub> value 1–14 dpi indicating significant reduction in bacteriuria in Rag1<sup>-/-</sup>/Atg16L1<sup>HM</sup> mice at 7–14 dpi compared with Rag1<sup>-/-</sup> mice.  $n = 5–15$  mice per time point per genotype;  $n = 2$  experiments. \* $P < 0.05$ , \*\* $P < 0.01$  by two-way ANOVA with Bonferroni posttest.

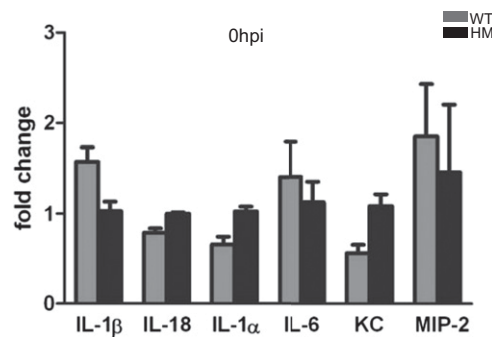

**Fig. S9.** Atg16L1 deficiency does not induce alterations in overall cytokine profiles before UPEC infection. Quantitative RT-PCR analysis of bladder tissue cytokine mRNA levels in uninfected WT and HM bladders does not exhibit any differences at baseline. Bars represent mean ± SEM;  $n = 3$  mice/genotype.

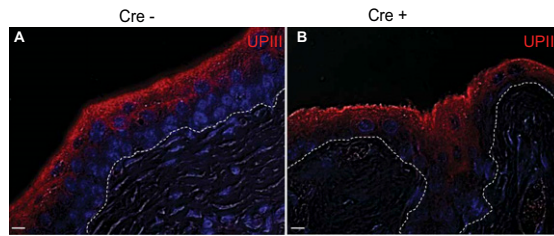

**Fig. S10.** *Atg5* deficiency in macrophages and granulocytes does not exhibit altered urothelial architecture. IF and DIC imaging analysis showing *Atg5<sup>fl/fl</sup>*-Lyz-Cre<sup>-</sup> (A) and Cre<sup>+</sup> (B) bladder superficial cells with normal uroplakin III (red) staining and no organellar congestion. (Scale bar: 10 μm.)
